In the immediate postoperative period the patient had excess secretions. Since no anticholinergics were given, adrenergic blockade producing relative parasympathetic stimulation and the surgical dissection around the trachea probably contributed to secretion formation. At no time preoperatively or postoperatively did the patient have symptoms of postural hypotension.

## REFERENCES

1. Sloan CM: Clinical Anesthesia. Vol 3. Edited by MT Jenkins. Philadelphia, F. A. Davis Co., 1963, p 202
2. Brewster WR, Isdles GP, Osgood AB, et al.: The hemodynamic and metabolic interrelationships in the activity of epinephrine, norepinephrine and thyroid hormones. *Circulation* 13:1, 1956
3. Crile GJ: Management of the patient with hyperthyroidism: Preoperative and postoperative care. *Surg Clin N Amer* 16:1051, 1936
4. Knight RT: The use of spinal anesthesia to control sympathetic overactivity in hyperthyroidism. *ANESTHESIOLOGY* 6:235, 1945
5. Rea CE: The treatment of thyroid crisis, with special reference to the possible use of spinal anesthesia. *Minn Med* 25:368, 1942
6. Canary JJ, Schaff M, Duffy BJ, et al.: Effect of oral and intramuscular administration of reserpine in thyrotoxicosis. *New Eng J Med* 257:435, 1957
7. Gaffney TE, Braunwald E, Kohler RL: Effects of guanethidine on tri-iodothyroxine induced hyperthyroidism in man. *New Eng J Med* 265:16, 1961
8. Goldstein S, Killip T: Catecholamine depletion in thyrotoxicosis-effect of guanethidine in cardiovascular dynamics. *Circulation* 31: 219, 1965
9. Turner P, Granville-Crossman KL, Smart JV: Effect of adrenergic receptor blockade on the tachycardia of thyrotoxicosis and anxiety state. *Lancet* 2:1316, 1965
10. McDowell FH, Lee JE: New tactics for hyperthyroidism: Sympathetic blockade. *Ann Intern Med* 72:749, 1970
11. Dollery CT, Paterson JW, Conally ME: Clinical pharmacology of beta receptor-blocking drugs. *Clin Pharmacol Ther* 10:765, 1969
12. Nickerson M: Blockade of the actions of adrenaline and noradrenaline. *Pharmacol Rev* 11:443, 1959
13. Shimosato S, Shanks C, Etsten BE: The effect of methoxyflurane on the inotropic state of myocardial muscle. *ANESTHESIOLOGY* 29: 538, 1968
14. Shires T: Clinical Anesthesia. Vol 3. Edited by MT Jenkins. Philadelphia, F. A. Davis Co., 1963, p 206
15. Wase AW, Foster WC: Thiopental and thyroid metabolism. *Proc Soc Exp Biol Med* 91:89, 1956
16. Oyana T, Shibata S, Matsuki A, et al.: Effect of methoxyflurane anesthesia on thyroid function in man. *Canad Anaesth Soc J* 16: 204, 1969
17. Jacques A, Hudson F: Effect of epinephrine on the human heart during methoxyflurane anesthesia. *Canad Anaesth Soc J* 10:53, 1963
18. Li T-H, Shaul MS, Etsten BE: Decreased adrenal venous catecholamine concentrations during methoxyflurane anesthesia. *ANESTHESIOLOGY* 29:1145, 1968

## Drugs

**ANESTHETICS AND WATER STRUCTURE** Pauling and Miller proposed independently that the presence of an anesthetic gas in tissue induced a cage-like arrangement of hydrogen-bonded water molecules. If during anesthesia the number of hydrogen-bonded water molecules in tissue is increased, then the movement of an average water molecule should be hindered. A change in the flux of tritiated water could not be detected in rat cecum exposed *in vitro* to 20 per cent cyclopropane. However, the histologic injury in this tissue proved to be greater than those in identical tissues not exposed to cyclopropane. When the cyclopropane concentration was reduced to approximately 10 per cent, the histologic appearances were the same in exposed and unexposed tissue, and under these circumstances water flux in exposed tissue was delayed by 12 per cent compared with unexposed tissues. If the mechanism of this decrement is the same as predicted by theory, the present observations indicate that cyclopropane may induce minute hydrate crystals or an "ice cover" in tissues. (Berger, E. Y., Pecikyan, F. R., and Kanzaki, C.: *Anesthetic Gas and Water Structure: Cyclopropane Effect on Water-<sup>3</sup>H Flux across the Gut*, *Amer. J. Physiol.* 217: 414 (Aug.) 1969.)
